# Supplementary material for: Capacitive NO2 Detection Using CVD Graphene-Based Device
Source: MDPI journal article supplement (doi:10.3390/nano13020243), 2023-01-05
Supplement: s1 [file s1]

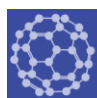Capacitive NO<sub>2</sub> Detection Using CVD Graphene-Based DeviceWonbin Ju <sup>1</sup> and Sungbae Lee <sup>2,\*</sup>

<sup>1</sup> Department of Physics and Photon Science, Gwangju Institute of Science and Technology, Gwangju 61005, Republic of Korea

<sup>2</sup> Korea Institute of Energy Technology, KENTECH College, Naju 58330, Jeonnam, Republic of Korea

\* Correspondence: jaylinlee@kentech.ac.kr

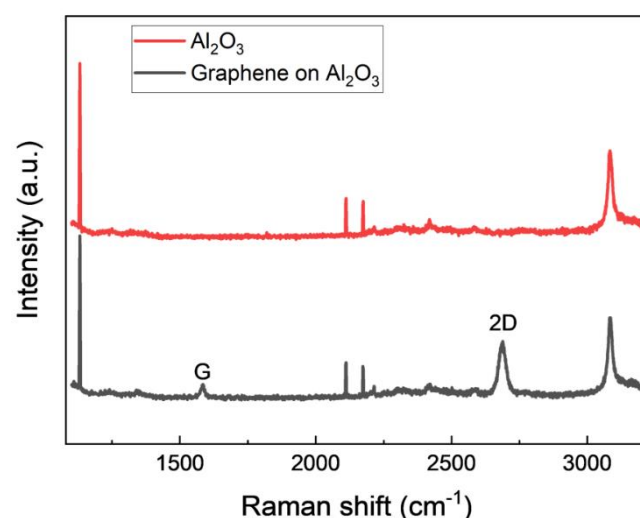

**Figure S1.** Raman spectroscopy of the Al<sub>2</sub>O<sub>3</sub> substrate and the graphene on the substrate measured using 532 nm laser at 5 mW at a range of 1000–3000 cm<sup>-1</sup>. The intensity ratio of 2D and G peaks is 4.5, indicating that the graphene samples used in our experiments are monolayer graphenes.

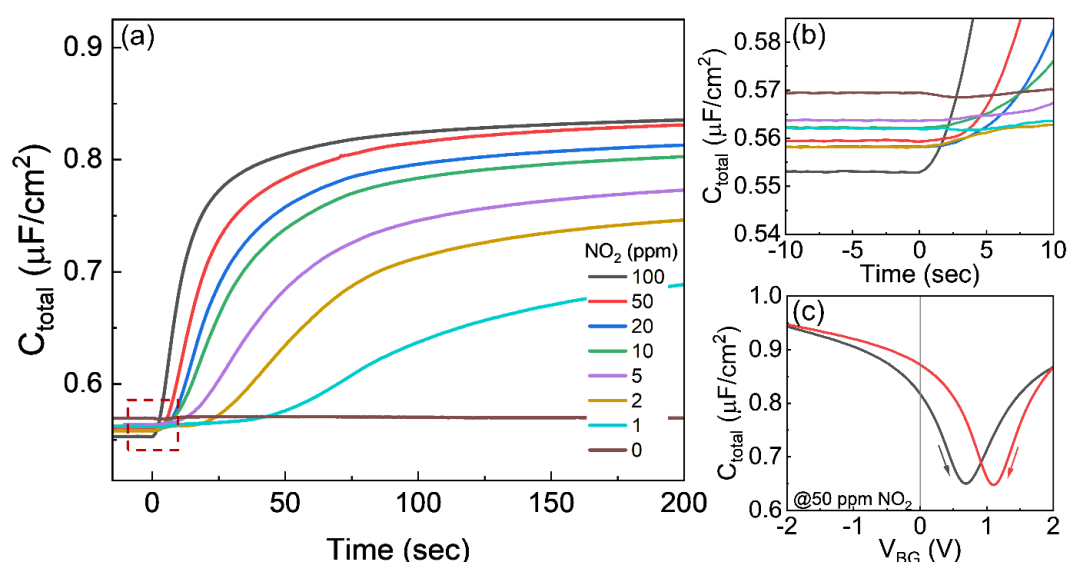

**Figure S2.** (a) Changes in  $C_{\text{total}}$  when the test chamber is filled with 0–100 ppm NO<sub>2</sub>. The response plot in Figure 4a is from the one converted from Figure S2a using equation (1). All initial  $C_{\text{total}}$  before NO<sub>2</sub> exposure is between 0.55 and 0.57  $\mu\text{F}/\text{cm}^2$ . All the initial values are not identical as shown in Figure S2b due to experimental reason. To make  $C_{\text{total}}$  before NO<sub>2</sub> exposure be identical, recovery optimization needs to be further studied. This is not covered in this work because the study on recovery optimization is out of the scope of this article. The  $C_{\text{total}}$  corresponding to the response values measured after 2 h exposure to NO<sub>2</sub> in Figure 6a is explained by gate-dependent  $C_{\text{total}}$  in

Figure 6b. Discrepancies between  $C_{\text{total}}$  measured after 2-hour exposure and  $C_{\text{total}}$  at  $V_{\text{BG}} = 0$  V are observed in Figure 6b. The discrepancy comes from the hysteresis effect during the gate-sweep measurement. The degree of hysteresis is known to become higher with increasing  $\text{NO}_2$  concentration [1]. An example of the hysteresis of gate-dependent  $C_{\text{total}}$  at 50 ppm  $\text{NO}_2$  is shown in Figure S2c. The different  $C_{\text{total}}$  values at  $V_{\text{BG}} = 0$  V for the sweeping directions explain the discrepancy between the response and gate-dependent measurement. The hysteresis can be reduced by increasing sweeping rate [1,2], and thus, gate voltage-dependent  $C_{\text{total}}$  can explain more precisely the capacitive  $\text{NO}_2$  response result.

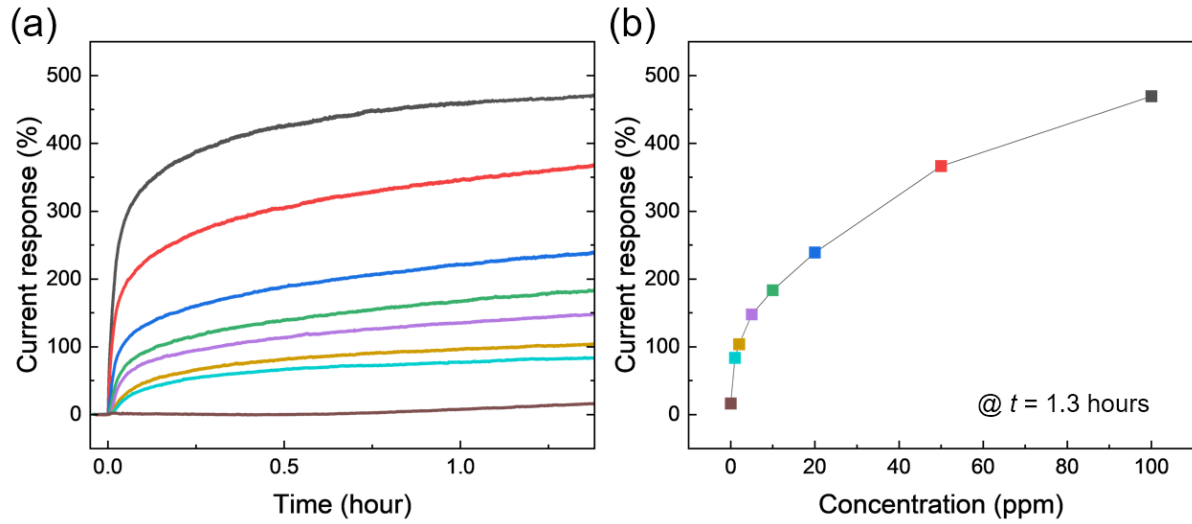

**Figure S3.** (a) The drain current response of the device using the same setup described in the main article except for the type of measurement and measuring time. The drain current of the device starts to increase when the test chamber is filled with the target concentrations of  $\text{NO}_2$ . The resistance of the device is changed by the concentrations of  $\text{NO}_2$ . The current response also depends on the concentrations of  $\text{NO}_2$  similar to the capacitive response as shown in (b).

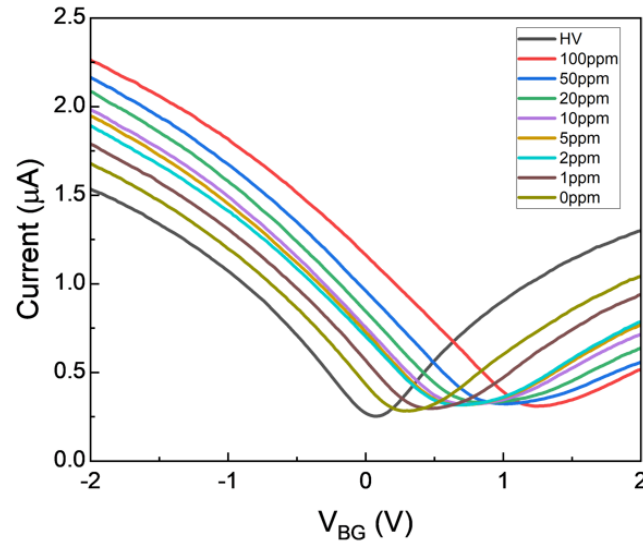

**Figure S4.** Gate voltage-dependent drain current of the device, which is exposed to various concentrations of  $\text{NO}_2$ , was measured after finishing the drain current response measurement. The curves are shifted to the right in accordance with the concentrations, supporting the mechanism of drain current response similar to the capacitive response.

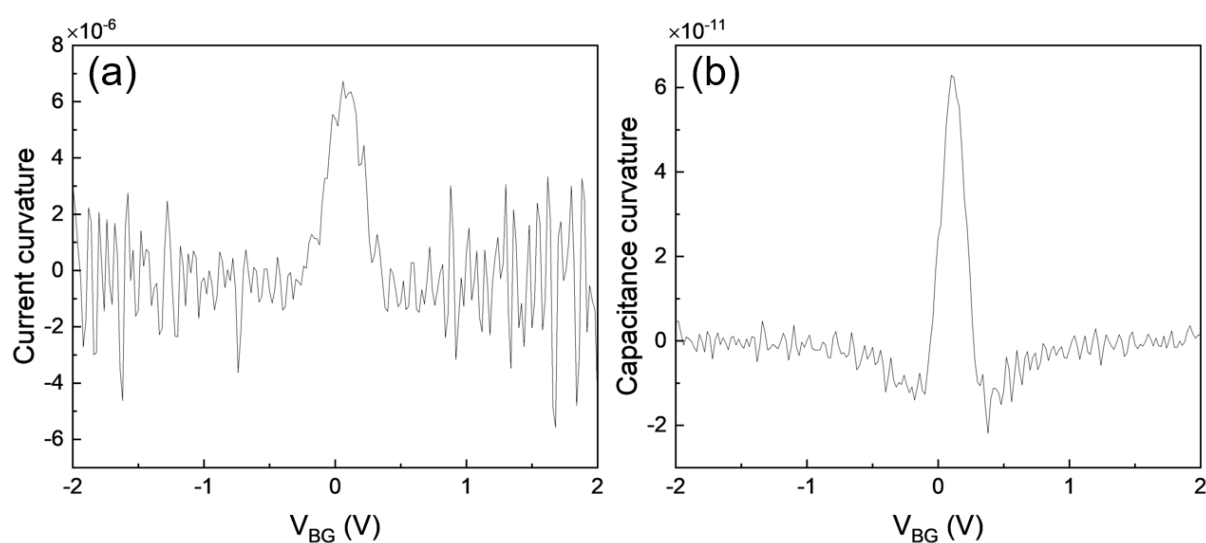

**Figure S5.** Curvatures are calculated using equation (S1) from the gate-dependent current in Figure 4 and Figure 6b measured under vacuum:

$$k = y'' / (1 + y'^2)^{3/2} \quad (S1)$$

where  $k$  is the curvature of a curve. The curvature is the maximum value at the Dirac point and is decreased as the gate voltage increase. Full width at half maximum (FWHM) of the capacitance and current are 0.028 and 0.21, respectively. This indicates that the gate-dependent capacitance exhibits a more dramatic change in its value near Dirac point compared to the gate-dependent current measurement, indicating a sharper initial change. In turn, this proves that the capacitive measurement shows the greater sensitivity when  $\text{NO}_2$  is introduced than the resistive measurement.

## References

1. Wei, J.; Liang, B.; Cao, Q.; Ren, H.; Zheng, Y.; Ye, X. Understanding asymmetric transfer characteristics and hysteresis behaviors in graphene devices under different chemical atmospheres. *Carbon* **2020**, *156*, 67–76.
2. Wang, H.; Wu, Y.; Cong, C.; Shang, J.; Yu, T. Hysteresis of electronic transport in graphene transistors. *ACS nano* **2010**, *4*, 7221–7228.
